# Supplementary material for: A Proteomic Study of the Effect of N-acetylcysteine on the Regulation of Early Pregnancy in Goats
Source: MDPI journal article supplement (doi:10.3390/ani12182439), 2022-09-15
Supplement: s1 [file s1]

**Supplemental Table S1 Compositions and nutrients levels of the basal diets (air-dry basis)**

| <b>raw materials</b>      | <b>Percentage (%)</b> | <b>Nutritional level</b>    | <b>Percentage (%)</b> |
|---------------------------|-----------------------|-----------------------------|-----------------------|
| Corn silage               | 50.00                 | DM                          | 60.13                 |
| Chinese wildrye           | 20.00                 | Metabolic energy (MJ/kg DM) | 12.51                 |
| Corn                      | 15.00                 | Crude protein               | 13.42                 |
| Soybean meal              | 8.02                  | Organic matter              | 86.38                 |
| Wheat bran                | 4.98                  | NDF                         | 38.67                 |
| Calcium bicarbonate       | 0.50                  | ADF                         | 31.07                 |
| Sodium chloride           | 0.50                  | Ca                          | 0.68                  |
| <b>Premix<sup>#</sup></b> | 1.00                  | P                           | 0.49                  |
| Total                     | 100.00                |                             |                       |

<sup>#</sup>Per kilogram of premix of the diet contains vitamin A 55,000 IU, vitamin D 11,500 IU, vitamin E 13,000 IU, MgSO<sub>4</sub>·H<sub>2</sub>O 110 g, CuSO<sub>4</sub>·5H<sub>2</sub>O 0.7 g, FeSO<sub>4</sub>·7H<sub>2</sub>O 3.0 g, MnSO<sub>4</sub>·H<sub>2</sub>O 2.5 g, ZnSO<sub>4</sub>·H<sub>2</sub>O 5.0 g, Na<sub>2</sub>SeO<sub>3</sub> 15 mg, KI 40 mg, CoCl<sub>2</sub>·6H<sub>2</sub>O 28 mg. DM, dry matter; NDF, neutral detergent fibre; ADF, acid detergent fibre.

**Supplemental Table S2 primer parameters of each gene**

| Gene name      | Primer sequence (5'-3')                            | GenBank ID     | Fragment size /bp | Tm/°C |
|----------------|----------------------------------------------------|----------------|-------------------|-------|
| <i>PELO</i>    | F: AACCGCCAGTTCACCCT<br>R: GCCTTTCCGTTTCCGAG       | XM_005694722.2 | 201               | 57    |
| <i>SLC27A4</i> | F: GCAATGAGTTTGTGGGT<br>R: CAGAAGAGGTTGAGCGA       | XM_018055876.1 | 199               | 57    |
| <i>SLC2A1</i>  | F: TGATTGGTTCCTTCTCCG<br>R: AGGACTTGCCCAGTTTTG     | NM_001314223.1 | 126               | 57    |
| <i>ITGAL</i>   | F: TTTGCGGCTGTTCACTTTT<br>R: TTCTGTTTCGTCGGTGGCTT  | NM_001314316.1 | 239               | 57    |
| <i>GFAP</i>    | F: CAGTGGCGTCCAGCAACAT<br>R: CTCCAGGTCGCAAGTCAAG   | XM_018065254.1 | 163               | 57    |
| <i>OLFML3</i>  | F: CAGAGCAGCAGTGGGATA<br>R: CGGGGGAAATAAGGGAGT     | XM_005677850.3 | 178               | 57    |
| <i>TUBA4A</i>  | F: TGATGAGATCCGAAATGG<br>R: TAGTCAACAGAGAGCCGC     | XM_018059034.1 | 258               | 57    |
| <i>TOMM20</i>  | F: AGCAAACCTCTCCACCACC<br>R: TCCACATCATCTTCAGCCA   | XM_018042526.1 | 103               | 57    |
| <i>β-actin</i> | F: AGATGTGGATCAGCAAGCAG<br>R: CCAATCTCATCTCGTTTCTG | XM_018039831.1 | 139               | 57    |

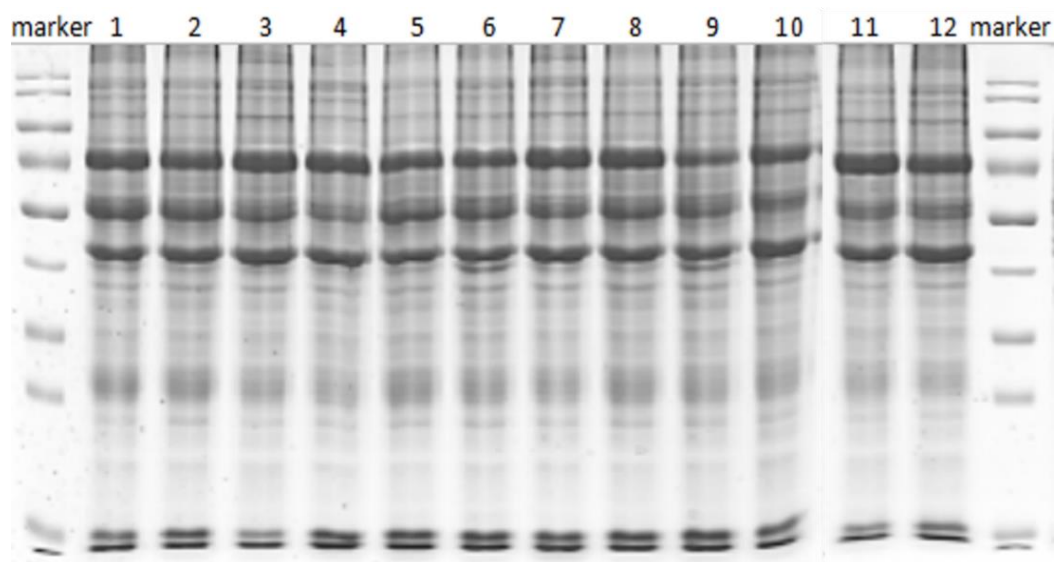

**Supplemental Figure S1 Identification of uterine horn protein by SDS-PAGE**

SDS-PAGE gel electrophoresis to test the quality of ewe uterine keratin samples

The loading amount is 15ug, which 1-6 is the control group, and 7-12 is the N-acetylcysteine group

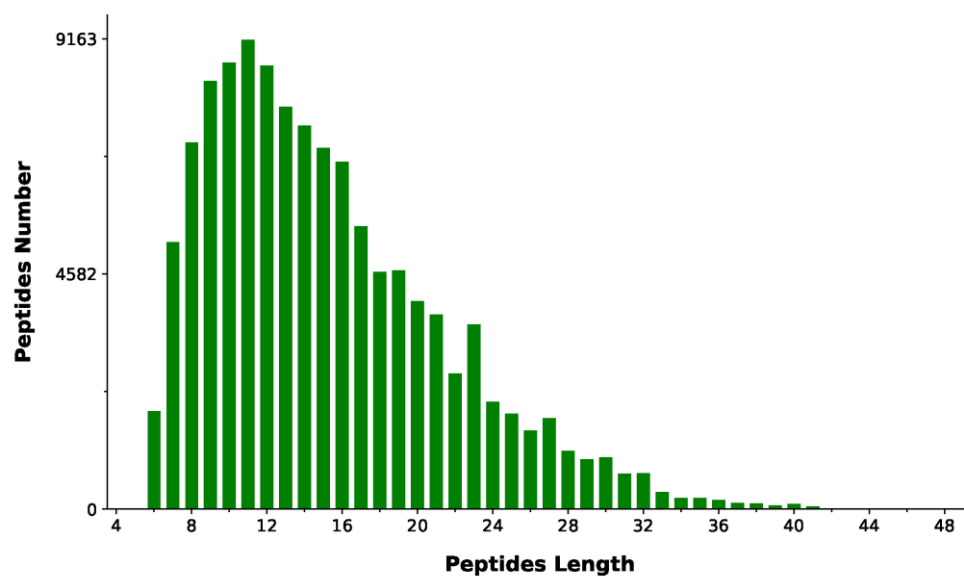

Supplemental Figure S2 Peptide length distribution

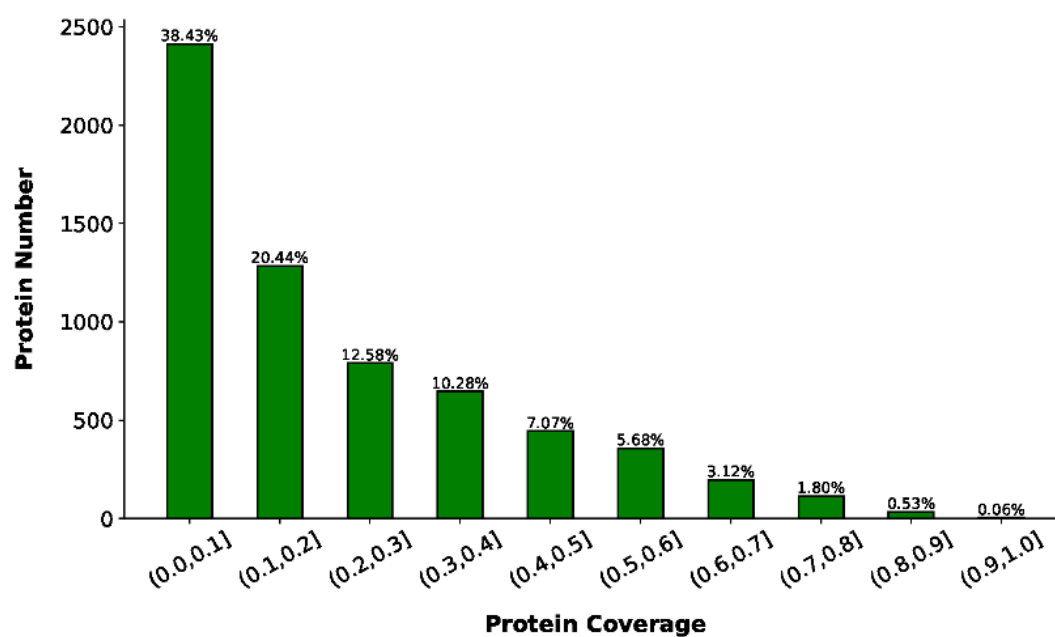

Supplemental Figure S3 Protein coverage distribution

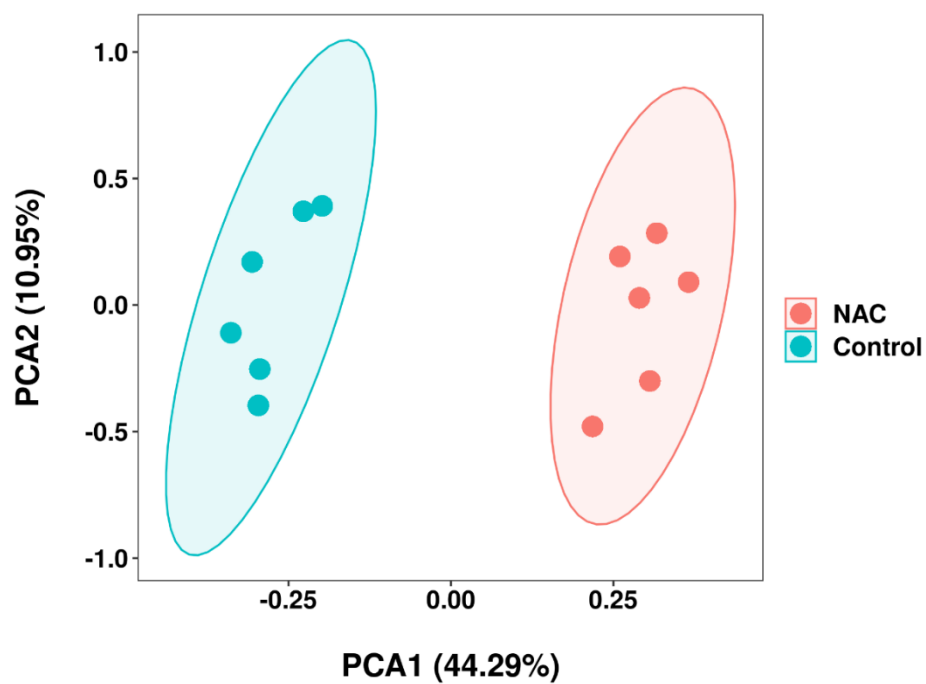

**Supplemental Figure S4 Principal component analysis**

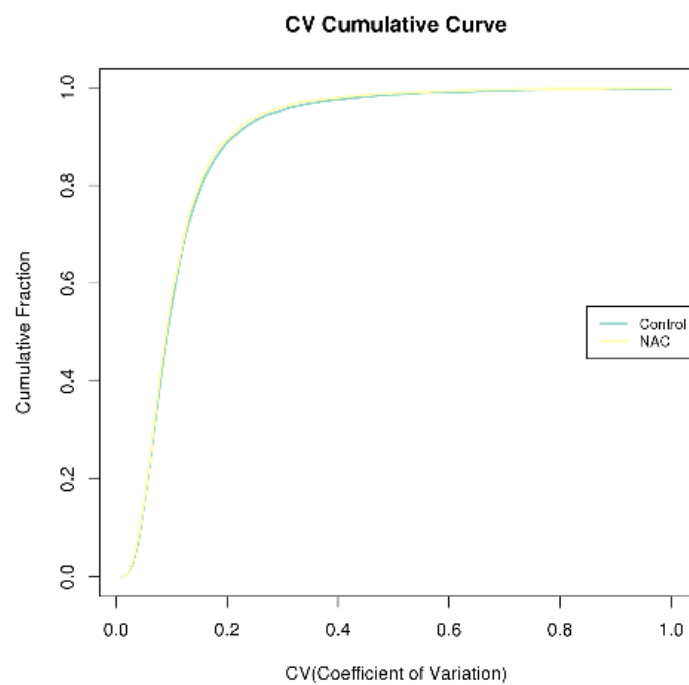

**Supplemental Figure S5 Coefficient of variation analysis**
